# Supplementary material for: Peanut shell carbon quantum dots modified with citric acid: amplifying visual detection of fluorescence sensitivity for Cu2+
Source: Royal Society of Chemistry journal article supplement (doi:10.1039/d4ta02487g), 2024-01-01
Supplement: d4ta02487g1.pdf [file d4ta02487g1.pdf]

## Supplementary Information

### Peanut Shell Carbon Quantum Dots Modified with Citric Acid: Amplifying Visual Detection of Fluorescent Sensitivity for Cu<sup>2+</sup>

Huma Javeria<sup>a</sup>, Muhammad Qamer Abbas<sup>b</sup>, Shu-Huan Chen<sup>a</sup> and Zhen-xia Du <sup>\*aa</sup> *College of Chemistry, Beijing University of Chemical Technology, Beijing 100029, People's Republic of China*

#### Corresponding Authors

\* Zhenxia Du, e-mail: [duzx@mail.buct.edu](mailto:duzx@mail.buct.edu).

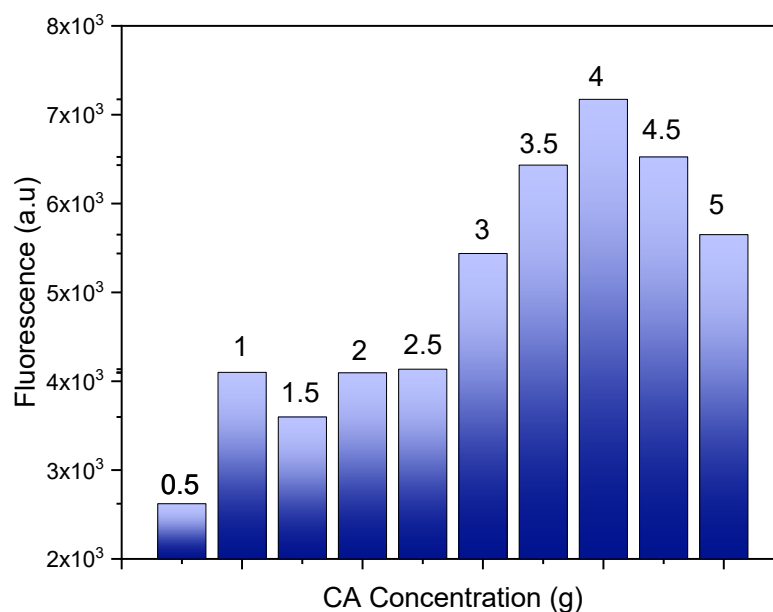

Fig. S1 CA concentration optimization

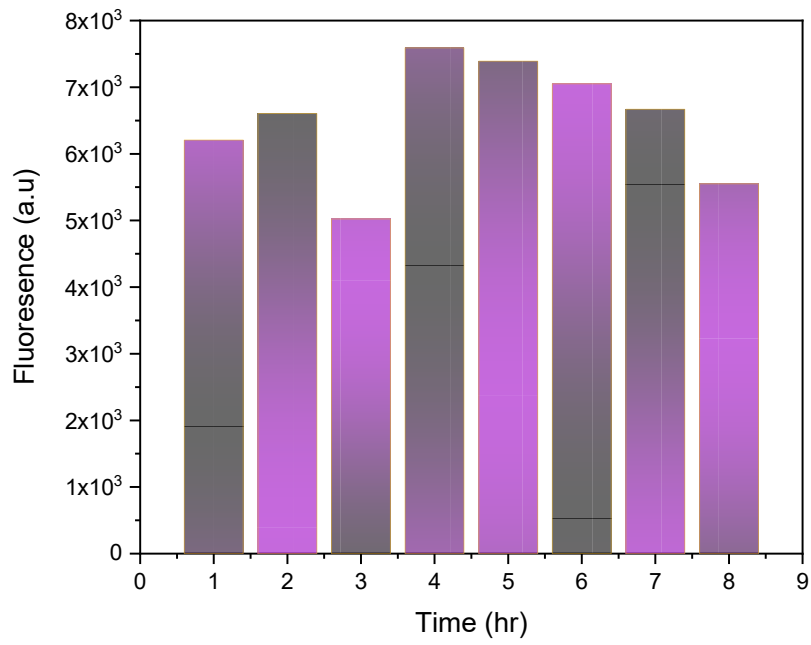

Fig. S2 Optimization of time for PSCA-CQD pyrolysis

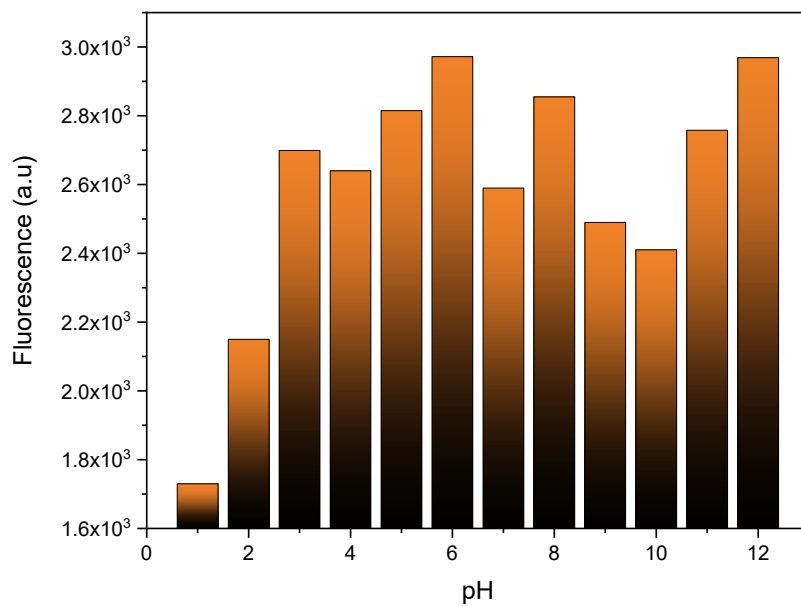

Fig. S3 Fluorescent stability of PSCA-CQD in pH ranging from 1-12

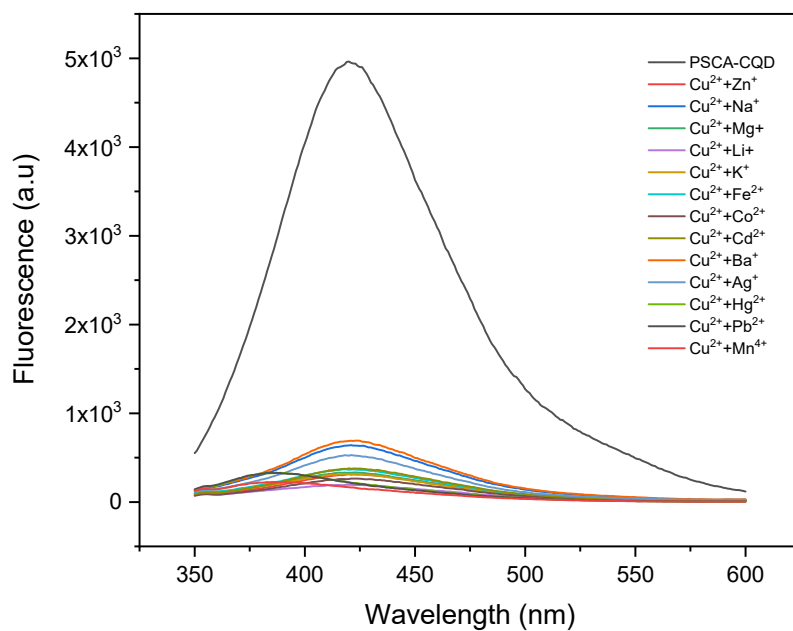

Fig. S4 Fluorescence Spectrum of metal interferences

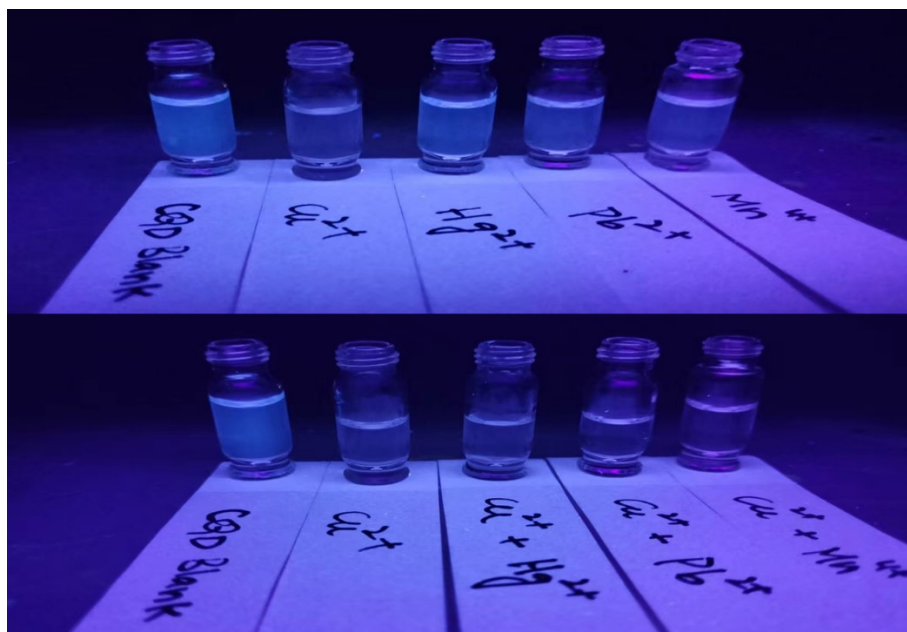

Fig. S5 Digital image of fluorescence sensitivity and selectivity of PSCA-CQD with Mn<sup>4+</sup>, Pb<sup>2+</sup>, and Hg<sup>2+</sup>
